# Supplementary material
Source: MDPI journal article supplement (https://www.mdpi.com/2297-8739/9/11/382)
Supplement: s1 [file s1]

## Supplementary file

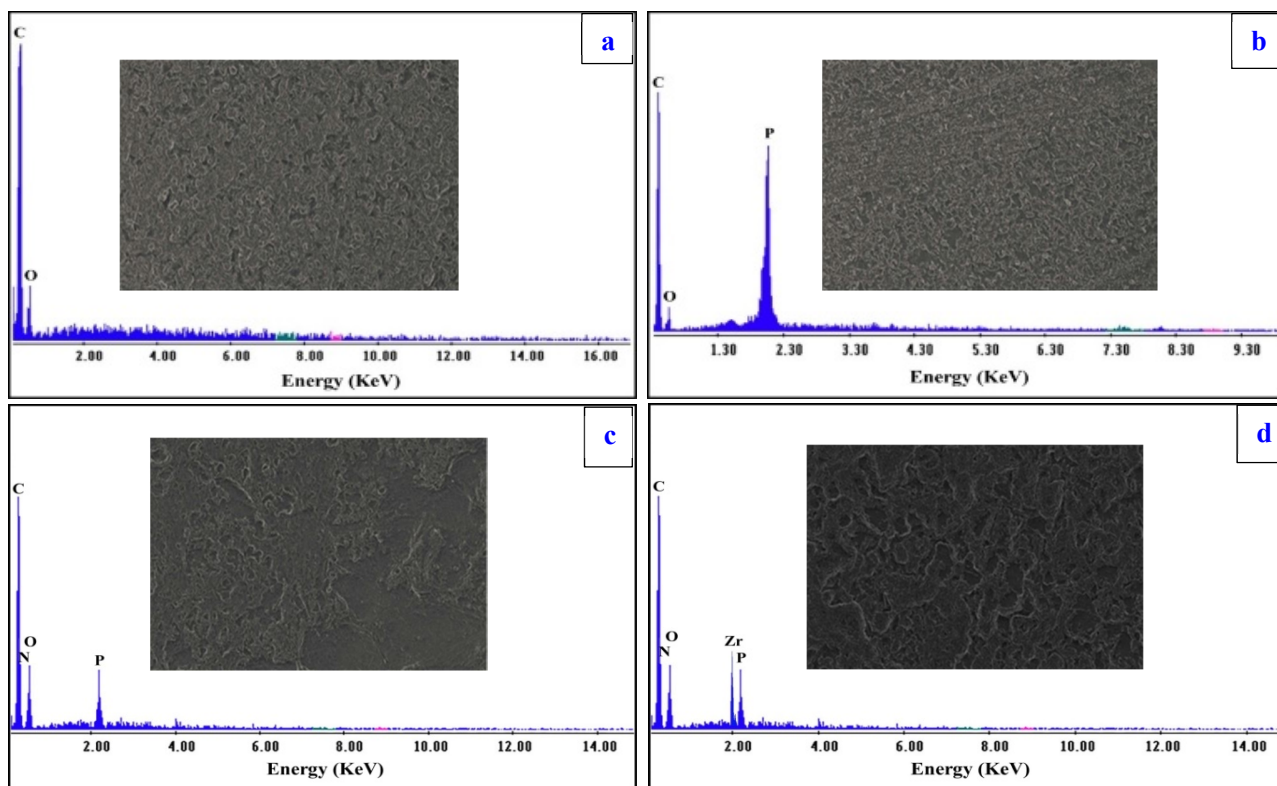

**Figure S1:** SEM-EDX of (a) PVA (b) PPVA (c) PPVP (d) PPVP-Zr after chelation.

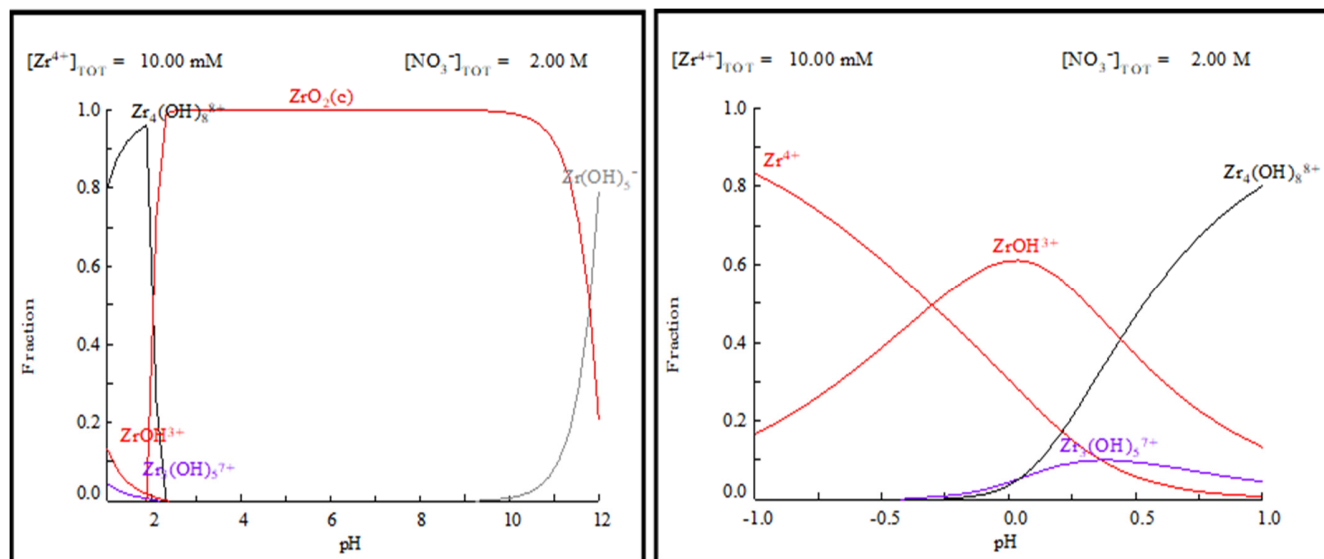

**Figure S2.** Speciation diagram for zirconium ions in nitrate medium at different pH using HYDRA-MEDUSA software.

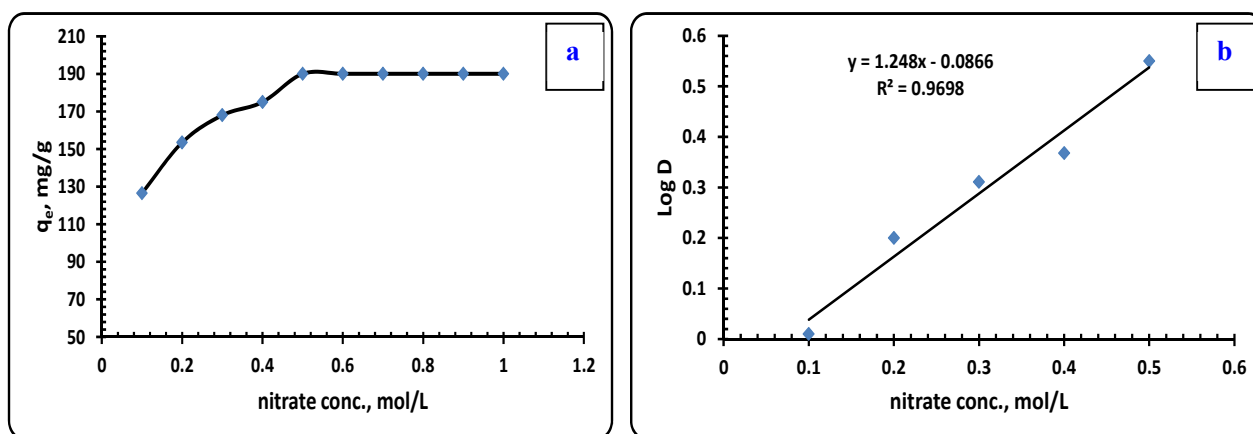

**Figure S3. (a)** The effect of nitrate ions concentration, on zirconium uptake by PPVP  
**(b)** The slope regression analysis diagram for zirconium ions uptake by PPVP at different nitrate ions concentration (*conditions:  $V$ : 50 mL, Zr concentration: 500 mg/L,  $m$ : 0.1 g,  $T$ : 25°C, shaking time : 20 min.*)

**Table S1.** Thermal properties of PVA, PPVA , PPVP and PPVP-Zr samples.

| Samples         | PVA       |            | PPVA      |            | PPVP      |            | PPVP-Zr   |            |
|-----------------|-----------|------------|-----------|------------|-----------|------------|-----------|------------|
| TGA stages      | temp., °C | wt loss, % |
| 1 <sup>st</sup> | 0-105     | 5          | 0-105     | 5          | 0-105     | 5          | 0-105     | 5          |
| 2 <sup>nd</sup> | 105-250   | 10         | 105-200   | 15         | 105-300   | 35         | 105-350   | 20         |
| 3 <sup>rd</sup> | 250-450   | 70         | 200-450   | 27         | 300-450   | 30         | 350-450   | 15         |
| 4 <sup>th</sup> | 450-600   | 15         | 450-900   | 43         | 450-700   | 20         | 450-750   | 20         |
| Final residue   | 600-1000  | -          | 900-1000  | 10         | 700-1000  | 10         | 750-1000  | 40         |

**Table S2.** The thermodynamic indices of zirconium ions extraction upon PPVP.

| Parameter        | $\Delta H$ , kJ/mol | $\Delta S$ , kJ/mol.K | $\Delta G$ , kJ/mol |        |        |       |        |
|------------------|---------------------|-----------------------|---------------------|--------|--------|-------|--------|
|                  |                     |                       | 298 K               | 308 K  | 318 K  | 328 K | 338 K  |
| Zr <sup>4+</sup> | -12.22              | -0.03                 | -3.138              | -2.948 | -2.624 | -2.26 | -1.941 |

**Table S3.** Mineralogical and chemical composition of zircon concentrate after physical separation.

| Mineralogical composition |             | Chemical composition           |             |
|---------------------------|-------------|--------------------------------|-------------|
| Mineral                   | Content (%) | component                      | Content (%) |
| Zircon                    | 90          | ZrO <sub>2</sub>               | 60.02       |
| Monazite                  | 0.42        | SiO <sub>2</sub>               | 37          |
| Rutile                    | 0.5         | Fe <sub>2</sub> O <sub>3</sub> | 0.45        |
| Ilmenite                  | 0.2         | Al <sub>2</sub> O <sub>3</sub> | 0.4         |
| Garnet                    | 2           | TiO <sub>2</sub>               | 0.4         |
| Quartz                    | 6           | RE <sub>2</sub> O <sub>3</sub> | 0.23        |
| Epidote                   | 0.12        | HfO <sub>2</sub>               | 1.33        |
| Hornblende                | 0.31        |                                |             |
| Feldspar                  | 0.3         |                                |             |

**Table S4.** ICP-OES characterization of highly pure zirconia concentrate produced by PPVP.

| Element     | Content, (%) | Element   | Content, (%) |
|-------------|--------------|-----------|--------------|
| <b>Zr</b>   | 72.77        | <b>Hf</b> | 1.35         |
| <b>Si</b>   | 0.0021       | <b>Al</b> | 0.0031       |
| <b>Na</b>   | 0.0023       | <b>K</b>  | 0.0005       |
| <b>Fe</b>   | 0.0011       | <b>Ti</b> | 0.0017       |
| <b>Ca</b>   | 0.0033       | <b>Mg</b> | 0.0022       |
| <b>REEs</b> | 0.0027       |           |              |
